# Supplementary material
Source: publisher figshare collection journal article supplement (https://acs.figshare.com/ndownloader/files/3703216)
Supplement: Supplementary file 1 [file 3703216]

data_songdp0916
_audit_creation_date              2015-09-17
_audit_creation_method
;
Olex2 1.2
(compiled 2015.01.26 svn.r3150 for OlexSys, GUI svn.r4998)
;
_publ_contact_author_address      ?
_publ_contact_author_email        ?
_publ_contact_author_name         ''
_publ_contact_author_phone        ?
_publ_section_references
;
Dolomanov, O.V., Bourhis, L.J., Gildea, R.J, Howard, J.A.K. & Puschmann, H.
 (2009), J. Appl. Cryst. 42, 339-341.

Sheldrick, G.M. (2008). Acta Cryst. A64, 112-122.
;
_chemical_name_common             ?
_chemical_name_systematic
;
 ? 
;
_chemical_formula_moiety          'C15 H25 N O2'
_chemical_formula_sum             'C15 H25 N O2'
_chemical_formula_weight          251.36
_chemical_melting_point           ?
loop_
  _atom_type_symbol
  _atom_type_description
  _atom_type_scat_dispersion_real
  _atom_type_scat_dispersion_imag
  _atom_type_scat_source
 'C' 'C' 0.0181 0.0091 'International Tables Vol C Tables 4.2.6.8 and 6.1.1.4'
 'H' 'H' 0.0000 0.0000 'International Tables Vol C Tables 4.2.6.8 and 6.1.1.4'
 'N' 'N' 0.0311 0.0180 'International Tables Vol C Tables 4.2.6.8 and 6.1.1.4'
 'O' 'O' 0.0492 0.0322 'International Tables Vol C Tables 4.2.6.8 and 6.1.1.4'

_space_group_crystal_system       'monoclinic'
_space_group_IT_number            14
_space_group_name_H-M_alt         'P 1 21/c 1'
_space_group_name_Hall            '-P 2ybc'
loop_
  _space_group_symop_id
  _space_group_symop_operation_xyz
 1 'x, y, z'
 2 '-x, y+1/2, -z+1/2'
 3 '-x, -y, -z'
 4 'x, -y-1/2, z-1/2'

_cell_length_a                    10.6087(13)
_cell_length_b                    12.4575(14)
_cell_length_c                    10.8471(15)
_cell_angle_alpha                 90.00
_cell_angle_beta                  104.219(13)
_cell_angle_gamma                 90.00
_cell_volume                      1389.6(3)
_cell_formula_units_Z             4
_cell_measurement_reflns_used     1287
_cell_measurement_temperature     291.48(10)
_cell_measurement_theta_max       63.1430
_cell_measurement_theta_min       5.5100
_exptl_absorpt_coefficient_mu     0.618
_exptl_absorpt_correction_T_max   1.00000
_exptl_absorpt_correction_T_min   0.95923
_exptl_absorpt_correction_type    multi-scan
_exptl_absorpt_process_details
;
CrysAlisPro, Agilent Technologies,
Version 1.171.37.33 (release 27-03-2014 CrysAlis171 .NET)
(compiled Mar 27 2014,17:12:48)
Empirical absorption correction using spherical harmonics,
 implemented in SCALE3 ABSPACK scaling algorithm.
;
_exptl_crystal_colour             'clear light colourless'
_exptl_crystal_colour_lustre      clear
_exptl_crystal_colour_modifier    light
_exptl_crystal_colour_primary     colourless
_exptl_crystal_density_diffrn     1.201
_exptl_crystal_density_meas       ?
_exptl_crystal_density_method     'not measured'
_exptl_crystal_description        block
_exptl_crystal_F_000              552
_exptl_crystal_size_max           0.26
_exptl_crystal_size_mid           0.24
_exptl_crystal_size_min           0.21
_exptl_special_details
;
 ? 
;
_diffrn_reflns_av_R_equivalents   0.0233
_diffrn_reflns_av_unetI/netI      0.0298
_diffrn_reflns_limit_h_max        12
_diffrn_reflns_limit_h_min        -12
_diffrn_reflns_limit_k_max        14
_diffrn_reflns_limit_k_min        -12
_diffrn_reflns_limit_l_max        11
_diffrn_reflns_limit_l_min        -12
_diffrn_reflns_number             5242
_diffrn_reflns_theta_full         69.77
_diffrn_reflns_theta_max          69.77
_diffrn_reflns_theta_min          4.30
_diffrn_ambient_environment       air
_diffrn_ambient_temperature       291.48(10)
_diffrn_detector                  'CCD plate'
_diffrn_detector_area_resol_mean  16.0733
_diffrn_detector_type             Eos
_diffrn_measured_fraction_theta_full 0.981
_diffrn_measured_fraction_theta_max 0.981
_diffrn_measurement_details
;
#__ type_ start__ end____ width___ exp.time_
  1 omega   22.00   63.00   1.0000    1.0000
omega____ theta____ kappa____ phi______ frames
    -        0.0000   57.0000   90.0000 41

#__ type_ start__ end____ width___ exp.time_
  2 omega   32.00   60.00   1.0000    1.0000
omega____ theta____ kappa____ phi______ frames
    -        0.0000   57.0000   30.0000 28

#__ type_ start__ end____ width___ exp.time_
  3 omega  -12.00   18.00   1.0000    1.0000
omega____ theta____ kappa____ phi______ frames
    -        0.0000   57.0000   30.0000 30

#__ type_ start__ end____ width___ exp.time_
  4 omega  -15.00   74.00   1.0000    2.0000
omega____ theta____ kappa____ phi______ frames
    -       54.0000  -57.0000   60.0000 89

#__ type_ start__ end____ width___ exp.time_
  5 omega   50.00   75.00   1.0000    2.0000
omega____ theta____ kappa____ phi______ frames
    -       54.0000  -77.0000   90.0000 25

#__ type_ start__ end____ width___ exp.time_
  6 omega   40.00  116.00   1.0000    2.5000
omega____ theta____ kappa____ phi______ frames
    -      108.0000 -111.0000   60.0000 76

#__ type_ start__ end____ width___ exp.time_
  7 omega   85.00  127.00   1.0000    2.5000
omega____ theta____ kappa____ phi______ frames
    -      108.0000  -63.0000  -30.0000 42

#__ type_ start__ end____ width___ exp.time_
  8 omega   51.00   92.00   1.0000    2.5000
omega____ theta____ kappa____ phi______ frames
    -      108.0000  -38.0000 -150.0000 41

#__ type_ start__ end____ width___ exp.time_
  9 omega   36.00   89.00   1.0000    2.5000
omega____ theta____ kappa____ phi______ frames
    -      108.0000  -25.0000 -180.0000 53

#__ type_ start__ end____ width___ exp.time_
 10 omega   51.00   79.00   1.0000    2.0000
omega____ theta____ kappa____ phi______ frames
    -       54.0000   57.0000 -180.0000 28

#__ type_ start__ end____ width___ exp.time_
 11 omega   57.00  123.00   1.0000    2.0000
omega____ theta____ kappa____ phi______ frames
    -       54.0000   57.0000 -150.0000 66

#__ type_ start__ end____ width___ exp.time_
 12 omega   83.00  160.00   1.0000    2.5000
omega____ theta____ kappa____ phi______ frames
    -      108.0000   77.0000  -60.0000 77

#__ type_ start__ end____ width___ exp.time_
 13 omega  142.00  172.00   1.0000    2.5000
omega____ theta____ kappa____ phi______ frames
    -      108.0000  111.0000  -60.0000 30

#__ type_ start__ end____ width___ exp.time_
 14 omega  141.00  169.00   1.0000    2.5000
omega____ theta____ kappa____ phi______ frames
    -      108.0000  111.0000    0.0000 28

#__ type_ start__ end____ width___ exp.time_
 15 omega  106.00  170.00   1.0000    2.5000
omega____ theta____ kappa____ phi______ frames
    -      108.0000  111.0000  120.0000 64

#__ type_ start__ end____ width___ exp.time_
 16 omega  101.00  136.00   1.0000    2.5000
omega____ theta____ kappa____ phi______ frames
    -      108.0000  111.0000    0.0000 35

#__ type_ start__ end____ width___ exp.time_
 17 omega   64.00  146.00   1.0000    2.5000
omega____ theta____ kappa____ phi______ frames
    -      108.0000  178.0000  -60.0000 82

#__ type_ start__ end____ width___ exp.time_
 18 omega  -12.00   82.00   1.0000    2.0000
omega____ theta____ kappa____ phi______ frames
    -       54.0000  -77.0000  -30.0000 94
;
_diffrn_measurement_device        'four-circle diffractometer'
_diffrn_measurement_device_type   'SuperNova, Dual, Cu at zero, Eos'
_diffrn_measurement_method        '\w scans'
_diffrn_orient_matrix_UB_11       0.1258459000
_diffrn_orient_matrix_UB_12       -0.0335594000
_diffrn_orient_matrix_UB_13       -0.0365854000
_diffrn_orient_matrix_UB_21       -0.0445426000
_diffrn_orient_matrix_UB_22       -0.1181491000
_diffrn_orient_matrix_UB_23       -0.0083025000
_diffrn_orient_matrix_UB_31       -0.0679866000
_diffrn_orient_matrix_UB_32       0.0152407000
_diffrn_orient_matrix_UB_33       -0.1415022000
_diffrn_radiation_monochromator   mirror
_diffrn_radiation_probe           x-ray
_diffrn_radiation_type            CuK\a
_diffrn_radiation_wavelength      1.54184
_diffrn_source                    'sealed X-ray tube'
_diffrn_source_type               'SuperNova (Cu) X-ray Source'
_diffrn_standards_decay_%         ?
_diffrn_standards_interval_count  ?
_diffrn_standards_interval_time   ?
_diffrn_standards_number          ?
_reflns_number_gt                 1839
_reflns_number_total              2565
_reflns_odcompleteness_completeness 99.85
_reflns_odcompleteness_iscentric  1
_reflns_odcompleteness_theta      66.97
_reflns_threshold_expression      >2sigma(I)
_computing_cell_refinement
;
CrysAlisPro, Agilent Technologies,
Version 1.171.37.33 (release 27-03-2014 CrysAlis171 .NET)
(compiled Mar 27 2014,17:12:48)
;
_computing_data_collection
;
CrysAlisPro, Agilent Technologies,
Version 1.171.37.33 (release 27-03-2014 CrysAlis171 .NET)
(compiled Mar 27 2014,17:12:48)
;
_computing_data_reduction
;
CrysAlisPro, Agilent Technologies,
Version 1.171.37.33 (release 27-03-2014 CrysAlis171 .NET)
(compiled Mar 27 2014,17:12:48)
;
_computing_molecular_graphics     'Olex2 (Dolomanov et al., 2009)'
_computing_publication_material   'Olex2 (Dolomanov et al., 2009)'
_computing_structure_refinement   'ShelXL (Sheldrick, 2008)'
_computing_structure_solution     'ShelXS (Sheldrick, 2008)'
_refine_diff_density_max          0.645
_refine_diff_density_min          -0.211
_refine_diff_density_rms          0.040
_refine_ls_extinction_coef        ?
_refine_ls_extinction_method      none
_refine_ls_goodness_of_fit_ref    1.083
_refine_ls_hydrogen_treatment     constr
_refine_ls_matrix_type            full
_refine_ls_number_parameters      164
_refine_ls_number_reflns          2565
_refine_ls_number_restraints      0
_refine_ls_R_factor_all           0.0770
_refine_ls_R_factor_gt            0.0576
_refine_ls_restrained_S_all       1.083
_refine_ls_shift/su_max           0.000
_refine_ls_shift/su_mean          0.000
_refine_ls_structure_factor_coef  Fsqd
_refine_ls_weighting_details
'calc w=1/[\s^2^(Fo^2^)+(0.0802P)^2^+0.3691P] where P=(Fo^2^+2Fc^2^)/3'
_refine_ls_weighting_scheme       calc
_refine_ls_wR_factor_gt           0.1606
_refine_ls_wR_factor_ref          0.1779
_refine_special_details
;
 Refinement of F^2^ against ALL reflections.  The weighted R-factor wR and 
 goodness of fit S are based on F^2^, conventional R-factors R are based 
 on F, with F set to zero for negative F^2^. The threshold expression of 
 F^2^ > 2sigma(F^2^) is used only for calculating R-factors(gt) etc. and is 
 not relevant to the choice of reflections for refinement.  R-factors based 
 on F^2^ are statistically about twice as large as those based on F, and R- 
 factors based on ALL data will be even larger. 
;
_olex2_refinement_description
;
1. Fixed Uiso
 At 1.2 times of:
  All C(H) groups, All C(H,H) groups
 At 1.5 times of:
  All O(H) groups
2.a Ternary CH refined with riding coordinates:
 C6(H6), C7(H7), C12(H12), C13(H13A)
2.b Secondary CH2 refined with riding coordinates:
 C2(H2A,H2B), C3(H3A,H3B), C4(H4A,H4B), C5(H5A,H5B), C8(H8A,H8B), C9(H9A,H9B),
 C10(H10A,H10B), C14(H14A,H14B), C15(H15A,H15B), C16(H16A,H16B)
2.c Idealised tetrahedral OH refined as rotating group:
 O13(H13)
;
_atom_sites_solution_hydrogens    geom
_atom_sites_solution_primary      direct
_atom_sites_solution_secondary    difmap
loop_
  _atom_site_label
  _atom_site_type_symbol
  _atom_site_fract_x
  _atom_site_fract_y
  _atom_site_fract_z
  _atom_site_U_iso_or_equiv
  _atom_site_adp_type
  _atom_site_occupancy
  _atom_site_calc_flag
  _atom_site_disorder_assembly
  _atom_site_disorder_group
  _atom_site_refinement_flags_posn
 O12 O -0.04574(15) -0.02660(12) -0.16034(14) 0.0522(4) Uani 1 d . . .
 O13 O 0.10369(18) -0.12352(14) -0.00914(16) 0.0652(5) Uani 1 d . . .
 H13 H 0.0968 -0.0878 0.0523 0.098 Uiso 1 calc . . GR
 N1 N -0.32447(18) -0.24326(15) -0.37707(17) 0.0515(5) Uani 1 d . . .
 C2 C -0.3993(3) -0.3427(2) -0.3982(3) 0.0730(8) Uani 1 d . . .
 H2A H -0.3789 -0.3852 -0.3209 0.088 Uiso 1 calc . . R
 H2B H -0.3746 -0.3839 -0.4645 0.088 Uiso 1 calc . . R
 C3 C -0.5439(3) -0.3215(3) -0.4366(3) 0.0873(10) Uani 1 d . . .
 H3A H -0.5657 -0.2845 -0.5178 0.105 Uiso 1 calc . . R
 H3B H -0.5904 -0.3892 -0.4466 0.105 Uiso 1 calc . . R
 C4 C -0.5856(3) -0.2542(3) -0.3380(3) 0.0871(10) Uani 1 d . . .
 H4A H -0.5753 -0.2950 -0.2600 0.105 Uiso 1 calc . . R
 H4B H -0.6765 -0.2350 -0.3682 0.105 Uiso 1 calc . . R
 C5 C -0.5025(2) -0.1528(2) -0.3124(3) 0.0699(7) Uani 1 d . . .
 H5A H -0.5216 -0.1081 -0.3880 0.084 Uiso 1 calc . . R
 H5B H -0.5247 -0.1125 -0.2442 0.084 Uiso 1 calc . . R
 C6 C -0.3580(2) -0.17855(19) -0.2759(2) 0.0508(6) Uani 1 d . . .
 H6 H -0.3412 -0.2228 -0.1989 0.061 Uiso 1 calc . . R
 C7 C -0.2720(2) -0.07800(18) -0.2455(2) 0.0492(5) Uani 1 d . . .
 H7 H -0.2917 -0.0427 -0.1717 0.059 Uiso 1 calc . . R
 C8 C -0.2897(3) 0.0053(2) -0.3532(2) 0.0626(7) Uani 1 d . . .
 H8A H -0.3802 0.0270 -0.3780 0.075 Uiso 1 calc . . R
 H8B H -0.2382 0.0684 -0.3217 0.075 Uiso 1 calc . . R
 C9 C -0.2499(3) -0.0366(2) -0.4692(2) 0.0689(7) Uani 1 d . . .
 H9A H -0.2471 0.0224 -0.5267 0.083 Uiso 1 calc . . R
 H9B H -0.3142 -0.0878 -0.5134 0.083 Uiso 1 calc . . R
 C10 C -0.1170(2) -0.0908(2) -0.4326(2) 0.0601(6) Uani 1 d . . .
 H10A H -0.0509 -0.0354 -0.4116 0.072 Uiso 1 calc . . R
 H10B H -0.1037 -0.1292 -0.5061 0.072 Uiso 1 calc . . R
 C11 C -0.0969(2) -0.16972(18) -0.3201(2) 0.0456(5) Uani 1 d . . .
 C12 C -0.1319(2) -0.11571(17) -0.20725(19) 0.0434(5) Uani 1 d . . .
 H12 H -0.1235 -0.1686 -0.1388 0.052 Uiso 1 calc . . R
 C13 C 0.0879(2) -0.0582(2) -0.1138(2) 0.0590(6) Uani 1 d . . .
 H13A H 0.1405 0.0066 -0.0892 0.071 Uiso 1 calc . . R
 C14 C 0.1355(2) -0.1154(2) -0.2175(3) 0.0658(7) Uani 1 d . . .
 H14A H 0.2216 -0.1443 -0.1815 0.079 Uiso 1 calc . . R
 H14B H 0.1424 -0.0638 -0.2826 0.079 Uiso 1 calc . . R
 C15 C 0.0450(2) -0.2067(2) -0.2788(2) 0.0612(7) Uani 1 d . . .
 H15A H 0.0520 -0.2652 -0.2186 0.073 Uiso 1 calc . . R
 H15B H 0.0720 -0.2332 -0.3524 0.073 Uiso 1 calc . . R
 C16 C -0.1854(2) -0.26749(18) -0.3508(2) 0.0527(6) Uani 1 d . . .
 H16A H -0.1682 -0.3035 -0.4242 0.063 Uiso 1 calc . . R
 H16B H -0.1635 -0.3170 -0.2797 0.063 Uiso 1 calc . . R

loop_
  _atom_site_aniso_label
  _atom_site_aniso_U_11
  _atom_site_aniso_U_22
  _atom_site_aniso_U_33
  _atom_site_aniso_U_23
  _atom_site_aniso_U_13
  _atom_site_aniso_U_12
 O12 0.0518(9) 0.0499(9) 0.0566(9) -0.0073(7) 0.0167(7) -0.0006(7)
 O13 0.0705(12) 0.0596(10) 0.0653(11) -0.0011(9) 0.0163(9) 0.0052(9)
 N1 0.0507(11) 0.0526(11) 0.0544(11) -0.0060(9) 0.0187(8) -0.0039(9)
 C2 0.0730(18) 0.0675(17) 0.0805(18) -0.0154(14) 0.0229(14) -0.0177(14)
 C3 0.0644(18) 0.104(3) 0.093(2) -0.0165(19) 0.0180(15) -0.0316(17)
 C4 0.0547(16) 0.114(3) 0.097(2) -0.009(2) 0.0277(15) -0.0187(17)
 C5 0.0497(14) 0.0866(19) 0.0773(17) -0.0051(15) 0.0230(12) 0.0024(13)
 C6 0.0462(12) 0.0597(14) 0.0504(12) 0.0023(10) 0.0193(9) 0.0021(10)
 C7 0.0501(12) 0.0513(12) 0.0508(12) -0.0038(10) 0.0212(9) 0.0080(10)
 C8 0.0605(15) 0.0509(13) 0.0753(16) 0.0075(12) 0.0144(12) 0.0088(11)
 C9 0.0781(18) 0.0714(17) 0.0581(14) 0.0203(13) 0.0186(13) 0.0025(14)
 C10 0.0694(16) 0.0690(16) 0.0491(12) 0.0019(11) 0.0286(11) -0.0040(13)
 C11 0.0461(12) 0.0483(12) 0.0468(11) -0.0020(9) 0.0200(9) 0.0027(9)
 C12 0.0469(11) 0.0424(11) 0.0443(11) -0.0001(9) 0.0178(9) 0.0022(9)
 C13 0.0515(13) 0.0655(15) 0.0625(14) -0.0045(12) 0.0186(11) -0.0033(12)
 C14 0.0458(13) 0.0883(19) 0.0678(15) -0.0094(14) 0.0224(11) -0.0022(13)
 C15 0.0521(13) 0.0688(15) 0.0692(15) -0.0125(13) 0.0271(11) 0.0084(12)
 C16 0.0567(13) 0.0474(12) 0.0582(13) -0.0092(10) 0.0223(10) 0.0041(10)

_geom_special_details
;
 All esds (except the esd in the dihedral angle between two l.s. planes) 
 are estimated using the full covariance matrix.  The cell esds are taken 
 into account individually in the estimation of esds in distances, angles 
 and torsion angles; correlations between esds in cell parameters are only 
 used when they are defined by crystal symmetry.  An approximate (isotropic) 
 treatment of cell esds is used for estimating esds involving l.s. planes. 
;
loop_
  _geom_bond_atom_site_label_1
  _geom_bond_atom_site_label_2
  _geom_bond_distance
  _geom_bond_site_symmetry_2
  _geom_bond_publ_flag
 O12 C12 1.449(3) . ?
 O12 C13 1.438(3) . ?
 O13 H13 0.8200 . ?
 O13 C13 1.373(3) . ?
 N1 C2 1.459(3) . ?
 N1 C6 1.474(3) . ?
 N1 C16 1.463(3) . ?
 C2 H2A 0.9700 . ?
 C2 H2B 0.9700 . ?
 C2 C3 1.510(4) . ?
 C3 H3A 0.9700 . ?
 C3 H3B 0.9700 . ?
 C3 C4 1.508(4) . ?
 C4 H4A 0.9700 . ?
 C4 H4B 0.9700 . ?
 C4 C5 1.527(4) . ?
 C5 H5A 0.9700 . ?
 C5 H5B 0.9700 . ?
 C5 C6 1.520(3) . ?
 C6 H6 0.9800 . ?
 C6 C7 1.537(3) . ?
 C7 H7 0.9800 . ?
 C7 C8 1.539(3) . ?
 C7 C12 1.516(3) . ?
 C8 H8A 0.9700 . ?
 C8 H8B 0.9700 . ?
 C8 C9 1.514(4) . ?
 C9 H9A 0.9700 . ?
 C9 H9B 0.9700 . ?
 C9 C10 1.524(4) . ?
 C10 H10A 0.9700 . ?
 C10 H10B 0.9700 . ?
 C10 C11 1.541(3) . ?
 C11 C12 1.520(3) . ?
 C11 C15 1.532(3) . ?
 C11 C16 1.524(3) . ?
 C12 H12 0.9800 . ?
 C13 H13A 0.9800 . ?
 C13 C14 1.519(3) . ?
 C14 H14A 0.9700 . ?
 C14 H14B 0.9700 . ?
 C14 C15 1.531(4) . ?
 C15 H15A 0.9700 . ?
 C15 H15B 0.9700 . ?
 C16 H16A 0.9700 . ?
 C16 H16B 0.9700 . ?

loop_
  _geom_angle_atom_site_label_1
  _geom_angle_atom_site_label_2
  _geom_angle_atom_site_label_3
  _geom_angle
  _geom_angle_site_symmetry_1
  _geom_angle_site_symmetry_3
  _geom_angle_publ_flag
 C13 O12 C12 113.36(17) . . ?
 C13 O13 H13 109.5 . . ?
 C2 N1 C6 111.10(19) . . ?
 C2 N1 C16 109.83(19) . . ?
 C16 N1 C6 112.58(17) . . ?
 N1 C2 H2A 109.3 . . ?
 N1 C2 H2B 109.3 . . ?
 N1 C2 C3 111.8(3) . . ?
 H2A C2 H2B 107.9 . . ?
 C3 C2 H2A 109.3 . . ?
 C3 C2 H2B 109.3 . . ?
 C2 C3 H3A 109.5 . . ?
 C2 C3 H3B 109.5 . . ?
 H3A C3 H3B 108.0 . . ?
 C4 C3 C2 110.9(2) . . ?
 C4 C3 H3A 109.5 . . ?
 C4 C3 H3B 109.5 . . ?
 C3 C4 H4A 109.8 . . ?
 C3 C4 H4B 109.8 . . ?
 C3 C4 C5 109.4(2) . . ?
 H4A C4 H4B 108.2 . . ?
 C5 C4 H4A 109.8 . . ?
 C5 C4 H4B 109.8 . . ?
 C4 C5 H5A 109.2 . . ?
 C4 C5 H5B 109.2 . . ?
 H5A C5 H5B 107.9 . . ?
 C6 C5 C4 111.9(2) . . ?
 C6 C5 H5A 109.2 . . ?
 C6 C5 H5B 109.2 . . ?
 N1 C6 C5 109.53(19) . . ?
 N1 C6 H6 107.5 . . ?
 N1 C6 C7 111.49(17) . . ?
 C5 C6 H6 107.5 . . ?
 C5 C6 C7 113.0(2) . . ?
 C7 C6 H6 107.5 . . ?
 C6 C7 H7 107.9 . . ?
 C6 C7 C8 115.54(19) . . ?
 C8 C7 H7 107.9 . . ?
 C12 C7 C6 107.25(18) . . ?
 C12 C7 H7 107.9 . . ?
 C12 C7 C8 110.20(18) . . ?
 C7 C8 H8A 109.0 . . ?
 C7 C8 H8B 109.0 . . ?
 H8A C8 H8B 107.8 . . ?
 C9 C8 C7 113.0(2) . . ?
 C9 C8 H8A 109.0 . . ?
 C9 C8 H8B 109.0 . . ?
 C8 C9 H9A 109.3 . . ?
 C8 C9 H9B 109.3 . . ?
 C8 C9 C10 111.4(2) . . ?
 H9A C9 H9B 108.0 . . ?
 C10 C9 H9A 109.3 . . ?
 C10 C9 H9B 109.3 . . ?
 C9 C10 H10A 108.4 . . ?
 C9 C10 H10B 108.4 . . ?
 C9 C10 C11 115.35(19) . . ?
 H10A C10 H10B 107.5 . . ?
 C11 C10 H10A 108.4 . . ?
 C11 C10 H10B 108.4 . . ?
 C12 C11 C10 109.94(18) . . ?
 C12 C11 C15 108.35(18) . . ?
 C12 C11 C16 105.67(17) . . ?
 C15 C11 C10 111.00(18) . . ?
 C16 C11 C10 112.27(19) . . ?
 C16 C11 C15 109.40(19) . . ?
 O12 C12 C7 110.51(17) . . ?
 O12 C12 C11 111.32(16) . . ?
 O12 C12 H12 108.5 . . ?
 C7 C12 C11 109.50(17) . . ?
 C7 C12 H12 108.5 . . ?
 C11 C12 H12 108.5 . . ?
 O12 C13 H13A 108.5 . . ?
 O12 C13 C14 110.28(19) . . ?
 O13 C13 O12 111.23(19) . . ?
 O13 C13 H13A 108.5 . . ?
 O13 C13 C14 109.8(2) . . ?
 C14 C13 H13A 108.5 . . ?
 C13 C14 H14A 109.1 . . ?
 C13 C14 H14B 109.1 . . ?
 C13 C14 C15 112.5(2) . . ?
 H14A C14 H14B 107.8 . . ?
 C15 C14 H14A 109.1 . . ?
 C15 C14 H14B 109.1 . . ?
 C11 C15 H15A 109.3 . . ?
 C11 C15 H15B 109.3 . . ?
 C14 C15 C11 111.7(2) . . ?
 C14 C15 H15A 109.3 . . ?
 C14 C15 H15B 109.3 . . ?
 H15A C15 H15B 107.9 . . ?
 N1 C16 C11 114.54(18) . . ?
 N1 C16 H16A 108.6 . . ?
 N1 C16 H16B 108.6 . . ?
 C11 C16 H16A 108.6 . . ?
 C11 C16 H16B 108.6 . . ?
 H16A C16 H16B 107.6 . . ?

loop_
  _geom_torsion_atom_site_label_1
  _geom_torsion_atom_site_label_2
  _geom_torsion_atom_site_label_3
  _geom_torsion_atom_site_label_4
  _geom_torsion
  _geom_torsion_site_symmetry_1
  _geom_torsion_site_symmetry_2
  _geom_torsion_site_symmetry_3
  _geom_torsion_site_symmetry_4
  _geom_torsion_publ_flag
 O12 C13 C14 C15 -51.4(3) . . . . ?
 O13 C13 C14 C15 71.5(3) . . . . ?
 N1 C2 C3 C4 -57.0(4) . . . . ?
 N1 C6 C7 C8 65.5(2) . . . . ?
 N1 C6 C7 C12 -57.8(2) . . . . ?
 C2 N1 C6 C5 -58.7(3) . . . . ?
 C2 N1 C6 C7 175.5(2) . . . . ?
 C2 N1 C16 C11 -176.9(2) . . . . ?
 C2 C3 C4 C5 53.4(4) . . . . ?
 C3 C4 C5 C6 -54.4(3) . . . . ?
 C4 C5 C6 N1 56.8(3) . . . . ?
 C4 C5 C6 C7 -178.2(2) . . . . ?
 C5 C6 C7 C8 -58.4(3) . . . . ?
 C5 C6 C7 C12 178.34(19) . . . . ?
 C6 N1 C2 C3 59.6(3) . . . . ?
 C6 N1 C16 C11 -52.5(3) . . . . ?
 C6 C7 C8 C9 -64.6(3) . . . . ?
 C6 C7 C12 O12 -172.18(16) . . . . ?
 C6 C7 C12 C11 64.8(2) . . . . ?
 C7 C8 C9 C10 -48.2(3) . . . . ?
 C8 C7 C12 O12 61.3(2) . . . . ?
 C8 C7 C12 C11 -61.7(2) . . . . ?
 C8 C9 C10 C11 46.4(3) . . . . ?
 C9 C10 C11 C12 -51.8(3) . . . . ?
 C9 C10 C11 C15 -171.7(2) . . . . ?
 C9 C10 C11 C16 65.5(3) . . . . ?
 C10 C11 C12 O12 -64.1(2) . . . . ?
 C10 C11 C12 C7 58.4(2) . . . . ?
 C10 C11 C15 C14 68.9(3) . . . . ?
 C10 C11 C16 N1 -63.1(2) . . . . ?
 C12 O12 C13 O13 -64.4(2) . . . . ?
 C12 O12 C13 C14 57.6(2) . . . . ?
 C12 C7 C8 C9 57.1(3) . . . . ?
 C12 C11 C15 C14 -52.0(3) . . . . ?
 C12 C11 C16 N1 56.7(2) . . . . ?
 C13 O12 C12 C7 175.79(17) . . . . ?
 C13 O12 C12 C11 -62.3(2) . . . . ?
 C13 C14 C15 C11 50.3(3) . . . . ?
 C15 C11 C12 O12 57.4(2) . . . . ?
 C15 C11 C12 C7 179.85(18) . . . . ?
 C15 C11 C16 N1 173.17(18) . . . . ?
 C16 N1 C2 C3 -175.2(2) . . . . ?
 C16 N1 C6 C5 177.7(2) . . . . ?
 C16 N1 C6 C7 51.8(2) . . . . ?
 C16 C11 C12 O12 174.52(16) . . . . ?
 C16 C11 C12 C7 -63.0(2) . . . . ?
 C16 C11 C15 C14 -166.7(2) . . . . ?

_olex2_date_sample_data_collection 2015-09-17
_olex2_submission_special_instructions 'No special instructions were received'
